# Supplementary material
Source: publisher figshare collection journal article supplement (https://future-science-group.figshare.com/ndownloader/files/28655505)
Supplement: Supplementary file 1 [file 28655505]

**Supplementary Materials 5: Electropherograms of mitochondrial DNA**

The influence of sample quantity and lysis parameters on the success of ancient DNA extraction from skeletal remains

The evaluation of the resulting base sequences was carried out with the software SeqA (Applied Biosystems). For further information see Supplementary Materials 1. The electropherograms, which can be seen in the following, show that sequencing and base calling was successful even in cases which showed weak signals in the agarose gel electrophoreses (Figure 2).

**Supplementary figure 54: Electropherogram for GS97 (10 mg, 2 hours).** The alleles are illustrated in colour. Green = adenine, red = thymine, blue = cytosine, and black = guanine. The sequence starts from the point where a unique base allocation could be made.

**Supplementary figure 55: Electropherogram for GS97 (10 mg, 4 hours).** The alleles are illustrated in colour. Green = adenine, red = thymine, blue = cytosine, and black = guanine. The sequence starts from the point where a unique base allocation could be made.

**Supplementary figure 56: Electropherogram for GS97 (10 mg, 10 hours).** The alleles are illustrated in colour. Green = adenine, red = thymine, blue = cytosine, and black = guanine. The sequence starts from the point where a unique base allocation could be made.

**Supplementary figure 57: Electropherogram for GS97 (10 mg, 18 hours).** The alleles are illustrated in colour. Green = adenine, red = thymine, blue = cytosine, and black = guanine. The sequence starts from the point where a unique base allocation could be made.

**Supplementary figure 58: Electropherogram for GS97 (10 mg, 48 hours).** The alleles are illustrated in colour. Green = adenine, red = thymine, blue = cytosine, and black = guanine. The sequence starts from the point where a unique base allocation could be made.

**Supplementary figure 59: Electropherogram for GS97 (10 mg, 18 + 2 hours).** The alleles are illustrated in colour. Green = adenine, red = thymine, blue = cytosine, and black = guanine. The sequence starts from the point where a unique base allocation could be made.

**Supplementary figure 60: Electropherogram for GS97 (50 mg, 2 hours).** The alleles are illustrated in colour. Green = adenine, red = thymine, blue = cytosine, and black = guanine. The sequence starts from the point where a unique base allocation could be made.

**Supplementary figure 61: Electropherogram for GS97 (50 mg, 4 hours).** The alleles are illustrated in colour. Green = adenine, red = thymine, blue = cytosine, and black = guanine. The sequence starts from the point where a unique base allocation could be made.

**Supplementary figure 62: Electropherogram for GS97 (50 mg, 10 hours).** The alleles are illustrated in colour. Green = adenine, red = thymine, blue = cytosine, and black = guanine. The sequence starts from the point where a unique base allocation could be made.

**Supplementary figure 63: Electropherogram for GS97 (50 mg, 18 hours).** The alleles are illustrated in colour. Green = adenine, red = thymine, blue = cytosine, and black = guanine. The sequence starts from the point where a unique base allocation could be made.

**Supplementary figure 64: Electropherogram for GS97 (50 mg, 48 hours).** The alleles are illustrated in colour. Green = adenine, red = thymine, blue = cytosine, and black = guanine. The sequence starts from the point where a unique base allocation could be made.

**Supplementary figure 65: Electropherogram for GS97 (50 mg, 18 + 2 hours).** The alleles are illustrated in colour. Green = adenine, red = thymine, blue = cytosine, and black = guanine. The sequence starts from the point where a unique base allocation could be made.

**Supplementary figure 66: Electropherogram for GS97 (150 mg, 2 hours).** The alleles are illustrated in colour. Green = adenine, red = thymine, blue = cytosine, and black = guanine. The sequence starts from the point where a unique base allocation could be made.

**Supplementary figure 67: Electropherogram for GS97 (150 mg, 4 hours).** The alleles are illustrated in colour. Green = adenine, red = thymine, blue = cytosine, and black = guanine. The sequence starts from the point where a unique base allocation could be made.

**Supplementary figure 68: Electropherogram for GS97 (150 mg, 10 hours).** The alleles are illustrated in colour. Green = adenine, red = thymine, blue = cytosine, and black = guanine. The sequence starts from the point where a unique base allocation could be made.

**Supplementary figure 69: Electropherogram for GS97 (150 mg, 18 hours).** The alleles are illustrated in colour. Green = adenine, red = thymine, blue = cytosine, and black = guanine. The sequence starts from the point where a unique base allocation could be made.

**Supplementary figure 70: Electropherogram for GS97 (150 mg, 48 hours).** The alleles are illustrated in colour. Green = adenine, red = thymine, blue = cytosine, and black = guanine. The sequence starts from the point where a unique base allocation could be made.

**Supplementary figure 71: Electropherogram for GS97 (150 mg, 18 + 2 hours).** The alleles are illustrated in colour. Green = adenine, red = thymine, blue = cytosine, and black = guanine. The sequence starts from the point where a unique base allocation could be made.

**Supplementary figure 72: Electropherogram for GS97 (250 mg, 2 hours).** The alleles are illustrated in colour. Green = adenine, red = thymine, blue = cytosine, and black = guanine. The sequence starts from the point where a unique base allocation could be made.

**Supplementary figure 73: Electropherogram for GS97 (250 mg, 4 hours).** The alleles are illustrated in colour. Green = adenine, red = thymine, blue = cytosine, and black = guanine. The sequence starts from the point where a unique base allocation could be made.

**Supplementary figure 74: Electropherogram for GS97 (250 mg, 10 hours).** The alleles are illustrated in colour. Green = adenine, red = thymine, blue = cytosine, and black = guanine. The sequence starts from the point where a unique base allocation could be made.

**Supplementary figure 75: Electropherogram for GS97 (250 mg, 18 hours).** The alleles are illustrated in colour. Green = adenine, red = thymine, blue = cytosine, and black = guanine. The sequence starts from the point where a unique base allocation could be made.

**Supplementary figure 76: Electropherogram for GS97 (250 mg, 48 hours).** The alleles are illustrated in colour. Green = adenine, red = thymine, blue = cytosine, and black = guanine. The sequence starts from the point where a unique base allocation could be made.

**Supplementary figure 77: Electropherogram for GS97 (250 mg, 18 + 2 hours).** The alleles are illustrated in colour. Green = adenine, red = thymine, blue = cytosine, and black = guanine. The sequence starts from the point where a unique base allocation could be made.

**Supplementary figure 78: Electropherogram for DO902.01 (10 mg, 2 hours).** The alleles are illustrated in colour. Green = adenine, red = thymine, blue = cytosine, and black = guanine. The sequence starts from the point where a unique base allocation could be made.

**Supplementary figure 79: Electropherogram for DO902.01 (10 mg, 4 hours).** The alleles are illustrated in colour. Green = adenine, red = thymine, blue = cytosine, and black = guanine. The sequence starts from the point where a unique base allocation could be made.

**Supplementary figure 80: Electropherogram for DO902.01 (10 mg, 10 hours).** The alleles are illustrated in colour. Green = adenine, red = thymine, blue = cytosine, and black = guanine. The sequence starts from the point where a unique base allocation could be made.

**Supplementary figure 81: Electropherogram for DO902.01 (10 mg, 18 hours).** The alleles are illustrated in colour. Green = adenine, red = thymine, blue = cytosine, and black = guanine. The sequence starts from the point where a unique base allocation could be made.

**Supplementary figure 82: Electropherogram for DO902.01 (10 mg, 48 hours).** The alleles are illustrated in colour. Green = adenine, red = thymine, blue = cytosine, and black = guanine. The sequence starts from the point where a unique base allocation could be made.

**Supplementary figure 83: Electropherogram for DO902.01 (10 mg, 18 + 2 hours).** The alleles are illustrated in colour. Green = adenine, red = thymine, blue = cytosine, and black = guanine. The sequence starts from the point where a unique base allocation could be made.

**Supplementary figure 84: Electropherogram for DO902.01 (50 mg, 2 hours).** The alleles are illustrated in colour. Green = adenine, red = thymine, blue = cytosine, and black = guanine. The sequence starts from the point where a unique base allocation could be made.

**Supplementary figure 85: Electropherogram for DO902.01 (50 mg, 4 hours).** The alleles are illustrated in colour. Green = adenine, red = thymine, blue = cytosine, and black = guanine. The sequence starts from the point where a unique base allocation could be made.

**Supplementary figure 86: Electropherogram for DO902.01 (50 mg, 10 hours).** The alleles are illustrated in colour. Green = adenine, red = thymine, blue = cytosine, and black = guanine. The sequence starts from the point where a unique base allocation could be made.

**Supplementary figure 87: Electropherogram for DO902.01 (50 mg, 18 hours).** The alleles are illustrated in colour. Green = adenine, red = thymine, blue = cytosine, and black = guanine. The sequence starts from the point where a unique base allocation could be made.

**Supplementary figure 88: Electropherogram for DO902.01 (50 mg, 48 hours).** The alleles are illustrated in colour. Green = adenine, red = thymine, blue = cytosine, and black = guanine. The sequence starts from the point where a unique base allocation could be made.

**Supplementary figure 89: Electropherogram for DO902.01 (50 mg, 18 + 2 hours).** The alleles are illustrated in colour. Green = adenine, red = thymine, blue = cytosine, and black = guanine. The sequence starts from the point where a unique base allocation could be made.

**Supplementary figure 90: Electropherogram for DO902.01 (150 mg, 2 hours).** The alleles are illustrated in colour. Green = adenine, red = thymine, blue = cytosine, and black = guanine. The sequence starts from the point where a unique base allocation could be made.

**Supplementary figure 91: Electropherogram for DO902.01 (150 mg, 4 hours).** The alleles are illustrated in colour. Green = adenine, red = thymine, blue = cytosine, and black = guanine. The sequence starts from the point where a unique base allocation could be made.

**Supplementary figure 92: Electropherogram for DO902.01 (150 mg, 10 hours).** The alleles are illustrated in colour. Green = adenine, red = thymine, blue = cytosine, and black = guanine. The sequence starts from the point where a unique base allocation could be made.

**Supplementary figure 93: Electropherogram for DO902.01 (150 mg, 18 hours).** The alleles are illustrated in colour. Green = adenine, red = thymine, blue = cytosine, and black = guanine. The sequence starts from the point where a unique base allocation could be made.

**Supplementary figure 94: Electropherogram for DO902.01 (150 mg, 48 hours).** The alleles are illustrated in colour. Green = adenine, red = thymine, blue = cytosine, and black = guanine. The sequence starts from the point where a unique base allocation could be made.

**Supplementary figure 95: Electropherogram for DO902.01 (150 mg, 18 + 2 hours).** The alleles are illustrated in colour. Green = adenine, red = thymine, blue = cytosine, and black = guanine. The sequence starts from the point where a unique base allocation could be made.

**Supplementary figure 96: Electropherogram for DO902.01 (250 mg, 2 hours).** The alleles are illustrated in colour. Green = adenine, red = thymine, blue = cytosine, and black = guanine. The sequence starts from the point where a unique base allocation could be made.

**Supplementary figure 97: Electropherogram for DO902.01 (250 mg, 4 hours).** The alleles are illustrated in colour. Green = adenine, red = thymine, blue = cytosine, and black = guanine. The sequence starts from the point where a unique base allocation could be made.

**Supplementary figure 98: Electropherogram for DO902.01 (250 mg, 10 hours).** The alleles are illustrated in colour. Green = adenine, red = thymine, blue = cytosine, and black = guanine. The sequence starts from the point where a unique base allocation could be made.

**Supplementary figure 99: Electropherogram for DO902.01 (250 mg, 18 hours).** The alleles are illustrated in colour. Green = adenine, red = thymine, blue = cytosine, and black = guanine. The sequence starts from the point where a unique base allocation could be made.

**Supplementary figure 100: Electropherogram for DO902.01 (250 mg, 48 hours).** The alleles are illustrated in colour. Green = adenine, red = thymine, blue = cytosine, and black = guanine. The sequence starts from the point where a unique base allocation could be made.

**Supplementary figure 101: Electropherogram for DO902.01 (250 mg, 18 + 2 hours).** The alleles are illustrated in colour. Green = adenine, red = thymine, blue = cytosine, and black = guanine. The sequence starts from the point where a unique base allocation could be made.
